# Supplementary material for: Identification of key binding site residues of MCT1 for AR-C155858 reveals the molecular basis of its isoform selectivity
Source: PubMed Central journal article supplement (PMC4357239; doi:10.1042/bj20141223), 2015-02-06

## Supplementary Material

Table S1 Primers used in PCR generation of MCT1 mutants.

| Mutation          | LH primer                                             | RH primer                                             |
|-------------------|-------------------------------------------------------|-------------------------------------------------------|
| MCT1: Y34F        | catttctattggcttctcctttgcatttcccaaatccatc              | gatggatttgggaaatgcaaaggagaagccaatagaaatg              |
| MCT1: T55Y        | ttatattcagtgcaacgtacagtgaaagtgtcatggatcgtcc           | ggacgatatccatgacacttctactgtacgttgactgaataaa           |
| MCT1: M65L/M69L   | gatatcgccatcctgctggctgtcctgtatgccggag                 | ctccggcatacaggacagccagcaggatggacgatc                  |
| MCT1: N129A       | cttgctttcaacttggccccagctctgactatg                     | catagtcagagctggggccaagtgaaagcaag                      |
| MCT1: N147A       | aagcgaccattggcagcgggactggctatg                        | catagccagtcctcctgccaatggctcgtt                        |
| MCT1: G148A       | cgaccattggccaatgccctggctatggcagg                      | cctgccatagccagggcattggccaatggctc                      |
| MCT1:M151A        | gccaatggcctggctgcggcagggcagcccagtg                    | cactgggctgctgccgagccagccattggc                        |
| MCT1: A152L       | ccaatggcctggctatgtaggcagcccagtggtcc                   | ggaacactgggctgctaacaatagccaggccattgg                  |
| MCT1: F267V       | gtctggaaatgtggctatggtctttgggctttaccctttggtc           | gaccaaaaggggtaagagcccaaagaccatgaccacattccagac         |
| MCT1: F271Y       | ggctatgttctttggctctatacccctttggctcttc                 | gaaagaccaaaaggggtatagcccaaagaacatgacc                 |
| MCT1: L274P       | gggctctttaccctccggctctttcttagtaattatg                 | cataattactaagaaagaccggaggggtaagagccc                  |
| MCT1: L274P/S278V | gggctctttaccctccggctctttcttagtaattatg                 | cataattaacaagaaagaccggaggggtaagagccc                  |
| MCT1: S278V       | gggctctttaccctttggctctttcttagtaattatggaagagtaagcatttt | aaaatgctfactctaccataaftaacaagaaagaccaaaaggggtaagagccc |
| MCT1: D302E       | cattttggcttctgtgaaatggtggcaagacc                      | ggcttggccaccatttcaacgaagccaaaatg                      |
| MCT1: F360Y       | gtctttggattgcctatggttgctcagctcc                       | ggagctgagccaacctatggcaaatccaaagac                     |
| MCT1:F360A        | gtctttggattgccgaggttgctcagctcc                        | ggagctgagccaacctgcccgaatccaaagac                      |
| MCT1: S364G       | gcctttggttgctcggctccgtattgtttgagac                    | gtctcaacaatacggagccgagccaaccaaggc                     |
| MCT1: S364G/F360Y | gcctatggttgctcggctccgtattgtttgagac                    | gtctcaacaatacggagccgagccaacctatggc                    |
| MCT1: S364A       | gcctttggttgctcgcctccgtattgtttgagac                    | gtctcaacaatacggagccgagccaaccaaggc                     |
| MCT1: S364A/F360Y | gcctatggttgctcgcctccgtattgtttgagac                    | gtctcaacaatacggagccgagccaacctatggc                    |
| MCT1: L367Q       | gttgctcagctccgtacagttgagacgttgatg                     | catcaacgtctcaactgtacggagctgagccaac                    |
| MCT1: E319R       | ggtgaccattgtgagatgtgtcctgtcc                          | ggacaggacaacatctcaaatggtcacc                          |
| MCT1: C392A       | ggtgaccattgtggaatgtgtcctgtcctcctg                     | caggaggacaggacaacattcccaatggtcacc                     |

**Table S2** Uninhibited rates of L-lactate uptake into oocytes expressing different MCT1 mutants expressed as a percentage of rates observed for wild-type MCT1  $\pm$  S.E.M. of the number of separate oocytes shown. L-lactate uptake was determined over 5 minutes in the absence of AR-C155858 at a lactate concentration of 0.5 mM.

|             | % of wild type MCT1 activity | n (oocytes) |
|-------------|------------------------------|-------------|
| F360Y       | 106.9 $\pm$ 10.4             | 25          |
| S364A       | 111.1 $\pm$ 13.1             | 15          |
| S364A/F360Y | 106.7 $\pm$ 11.1             | 16          |
| F360Y       | 94.8 $\pm$ 2.6               | 153         |
| S364G       | 98.2 $\pm$ 9.1               | 30          |
| S364G/F360Y | 91.3 $\pm$ 7.6               | 83          |

**Figure S1 Expression and transport activity of MCT1 mutant F360A**

A: L-lactate uptake was measured over 5 minutes, 3 days after RNA injection. Uptake was corrected for MCT1-independent transport in water-injected oocytes ( $n = 5$ ) and data are presented as means  $\pm$  S.E.M. of 10 oocytes for both wild type and mutant MCT1. B: Plasma membrane expression of MCT1 in the oocyte membrane. Crude membrane preparations (10  $\mu$ g) were separated by SDS-PAGE and MCT1 expressed detected by Western blotting using the MCT1 C-terminal antibody. Equal loading was confirmed by Coomassie staining of the PVDF membrane.

**Figure S2 Expression and inhibition of MCT1 mutants**

A: AR-C155858 docked to an inward-open conformation of MCT1 identifies residues which may be involved in inhibitor binding. B: Inhibition of MCT1 mutants at 30 nM and 100 nM AR-C155858. Results are taken from 1-7 separate experiments for each mutant. Data are shown as a mean percentage inhibition normalised to the percent of wild-type MCT1 inhibition obtained during the same experiment. Results are shown  $\pm$  S.E.M. of 20-100 oocytes. Data has been corrected for uptake in water-injected oocytes ( $n = 5$ ). B: Plasma membrane expression of MCT1 mutants. Crude membrane preparations (10  $\mu$ g) were separated by SDS-PAGE and MCT1 expressed detected by Western blotting using the MCT1 C-terminal antibody. Equal loading was confirmed by Coomassie staining of the PVDF membrane. Black lines separate different blots. Controls (water injected oocytes) were always negative and have not been shown for each individual blot.

**Figure S3 Expression and inhibition of MCT4 mutants**

A: L-lactate uptake into *Xenopus* oocytes was measured over 5 minutes, 3 days after RNA injection. Uptake was corrected for MCT4-independent transport in water-injected oocytes ( $n=5$ ) and data are presented as Means  $\pm$  S.E.M. of 10-20 oocytes for both wild type and mutant MCT4. Plasma membrane expression of MCT4 in the oocyte membrane is shown in the inset. B: Inhibition of Y336F mutant by 10  $\mu$ M AR-C155858. Results are shown as % lactate uptake of oocytes incubated for 45 minutes with 10  $\mu$ M AR-C155858 compared to oocytes incubated in buffer alone. Data are presented as Means  $\pm$  % S.E.M. of 50-80 oocytes.

FIGURE S1

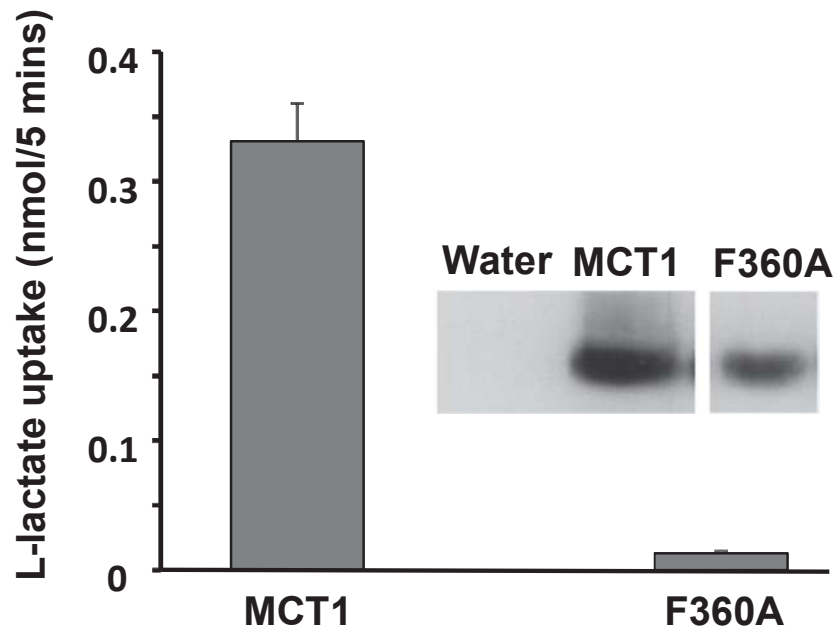

FIGURE S2

A

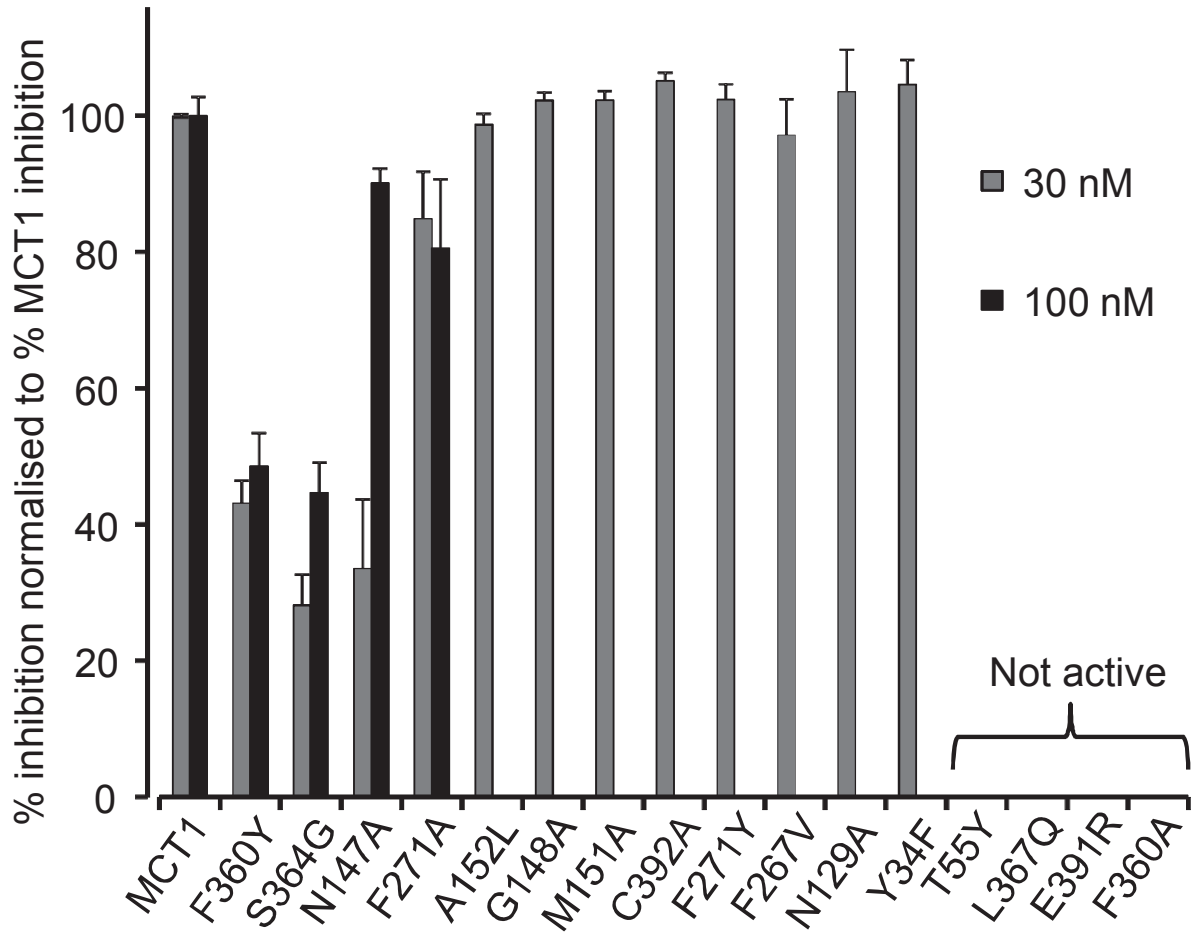

B

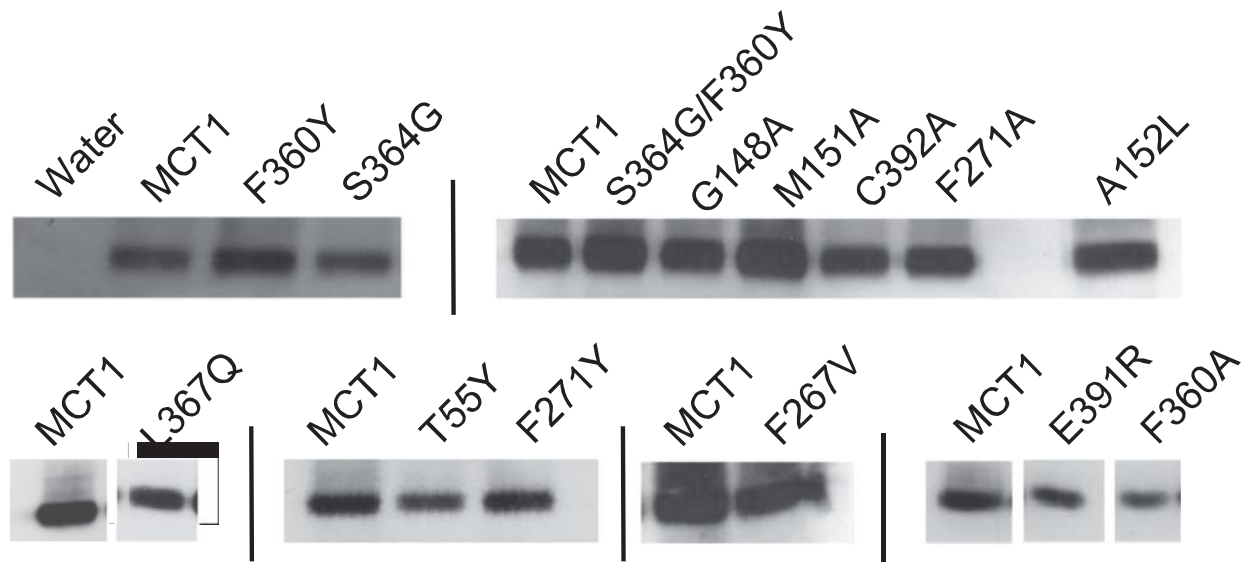

FIGURE S3

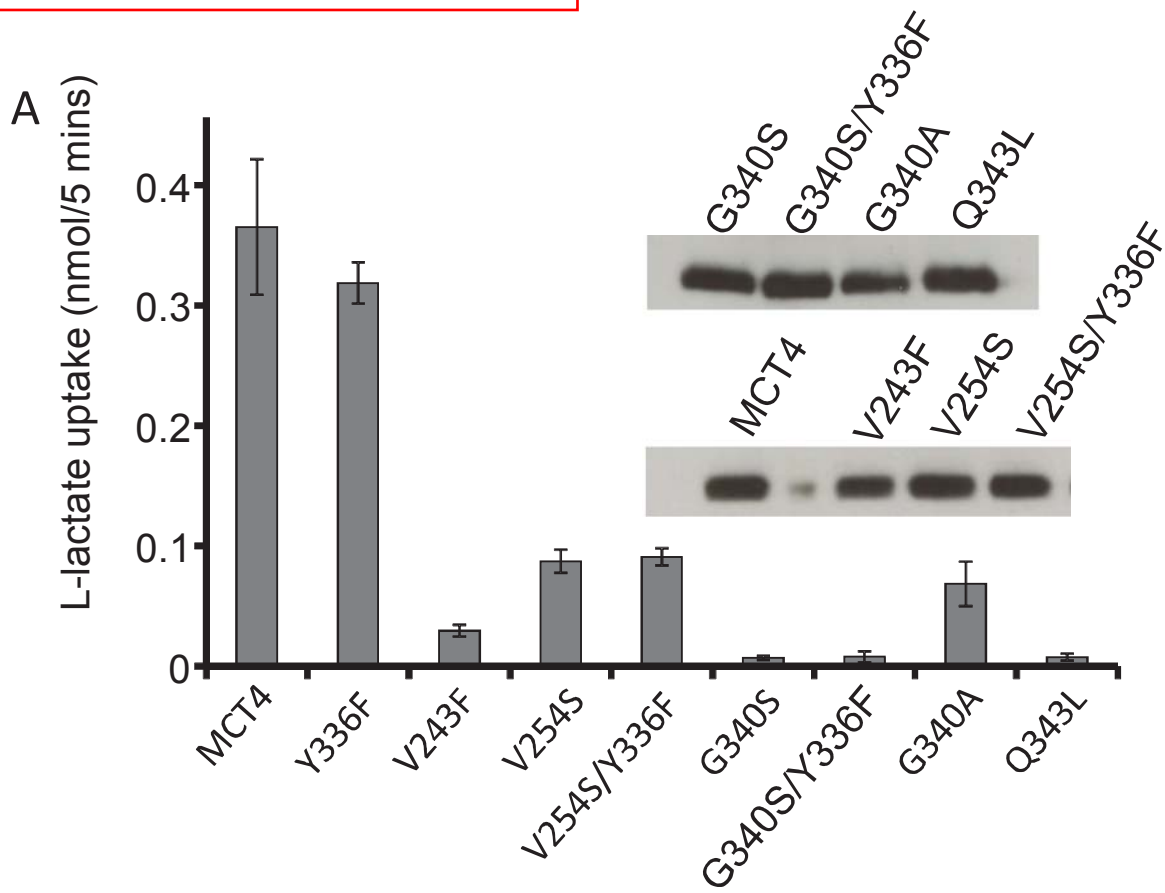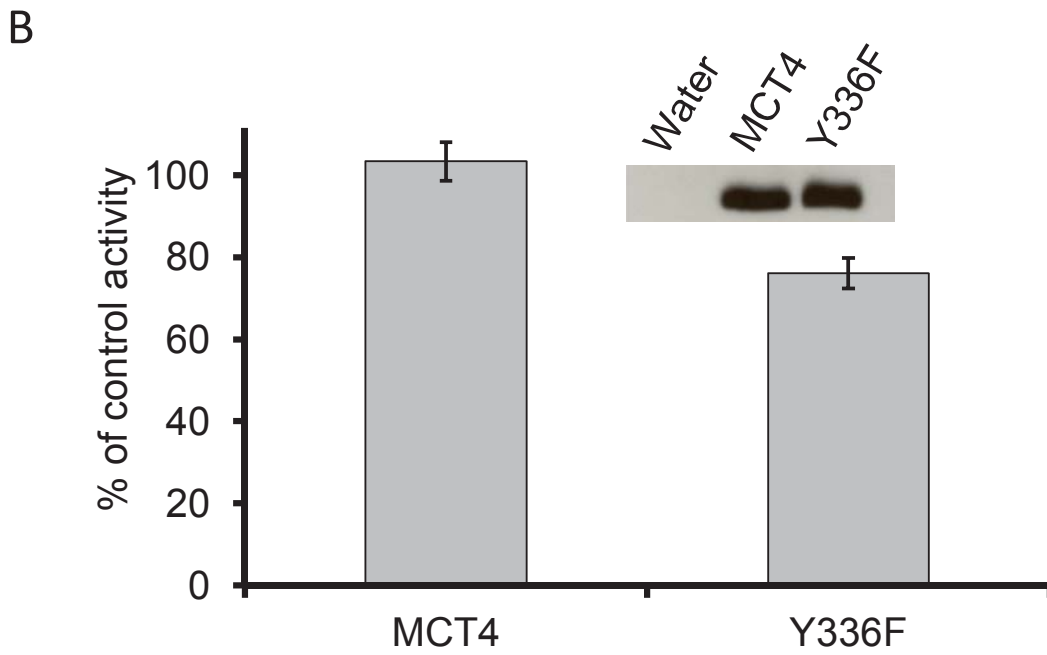

Supplement: bj4660177ntsadd.pdf [file bj4660177ntsadd.pdf]
